# Supplementary material for: Faunal Diet of Adult Cane Toads, Rhinella marina, in the Urban Landscape of Southwest Florida
Source: MDPI journal article supplement (doi:10.3390/ani13182898), 2023-09-13
Supplement: s1 [file s1]

Table S1. Summary of cane toad diet studies in native and introduced ranges. For Diet metric, an index of relative importance (IRI; [51]) was calculated if number, frequency, and volume/mass were available, and an alimentary importance index (AIi; [49]) was calculated if only two of the component metrics were available.

| Range      | Region          | Location/study                                                         | N           | Habitat                   | Life stage       | Diet metric | Primary                                                                                       | Secondary                                                                                        | Tertiary                                                                        | Comments                                                                                                                                                                     |
|------------|-----------------|------------------------------------------------------------------------|-------------|---------------------------|------------------|-------------|-----------------------------------------------------------------------------------------------|--------------------------------------------------------------------------------------------------|---------------------------------------------------------------------------------|------------------------------------------------------------------------------------------------------------------------------------------------------------------------------|
| Native     | Central America | Rio Grande, Nicaragua Noble, 1918 [96]                                 | "few"       | Urban                     | n/a              | Frequency   | Blattodea (large cockroaches) n/a                                                             |                                                                                                  |                                                                                 | Unquantified comment from text.                                                                                                                                              |
| Native     | Central America | Cocle, Panama Zug and Zug, 1979 [8]                                    | 9           | Grassy gravel pit         | Juvenile - adult | Frequency   | Formicidae (ants) 100%                                                                        | Carabidae (ground beetles) 67%                                                                   | Coleoptera ("oblong" beetles) 56%                                               | % frequency calculated from Table C in Appendix 1; oblong beetles include Elateridae (click beetles)/Cermabycidae (longhorn beetles)/Lampyridae (fireflies).                 |
| Native     | Central America | Gamboa, Panama Zug and Zug, 1979 [8]                                   | 10          | Urban                     | Juvenile - adult | Frequency   | Formicidae (ants) 80%                                                                         | Carabidae (ground beetles) 70%                                                                   | Diplopoda (millipedes) and Gastropoda (snails) 50%                              | % frequency calculated from Table C, Appendix 1.                                                                                                                             |
| Native     | Central America | Los Santos, Panama Zug and Zug, 1979 [8]                               | 12          | Scrub and patchy grass    | Juvenile - adult | Frequency   | Formicidae (ants) 83%                                                                         | Scarabaeidae (scarab beetles) and Coleoptera ("oblong" beetles) 25%                              | Winged Hymenopterans (bees and wasps) 17%                                       | % frequency calculated from Table C, Appendix 1; oblong beetles include Elateridae (click beetles)/Cermabycidae (longhorn beetles)/Lampyridae (fireflies).                   |
| Native     | Central America | Summit Hill, Panama Zug and Zug, 1979 [8]                              | 11          | Golf course               | Juvenile - adult | Frequency   | Scarabaeidae (scarab beetles) 82%                                                             | Winged Hymenoptera (bees and wasps) and Coleoptera ("oblong" beetles) 73%                        | Formicidae (ants) 55%                                                           | % frequency calculated from Table C, Appendix 1; oblong beetles include Elateridae (click beetles)/Cermabycidae (longhorn beetles)/Lampyridae (fireflies).                   |
| Native     | South America   | Trinidad & British Guiana Weber, 1938 [97]                             | 28          | Urban/clearings           | n/a              | Frequency   | <i>Ectatomma ruidum</i> (Neotropical ant) 57%                                                 | Coleoptera (beetle fragments and larvae) 39%                                                     | <i>Pheidole fallax</i> (big-headed ant) 36%                                     | % frequency calculated from the list of stomach contents and assuming 28 samples as described in the text.                                                                   |
| Native     | South America   | Santa Cecilia, Ecuador Duellman, 1978 [98]                             | 25          | River banks and clearings | n/a              | Frequency   | Formicidae (large ants) 68%                                                                   | Coleoptera (beetles) 64%                                                                         | Orthoptera (crickets and grasshoppers) 40%                                      | % frequency from the text.                                                                                                                                                   |
| Native     | South America   | Brazil, Rio Tapajós Strüssmann et al., 1984 [82]                       | 29          | Sandy river banks         | Adult            | All         | Hymenoptera (ants) 56%                                                                        | Isoptera/Blattodea (termites) 39%                                                                | Coleoptera (beetles) 4%                                                         | % number and % frequency from combined Fig. 3F and 3H used to calculate % AIi.                                                                                               |
| Native     | South America   | Golfito National Wildlife Refuge, Costa Rica Cabrera et al., 1996 [99] | 55          | n/a                       | Adult            | Frequency   | Hymenoptera (ants) 58%                                                                        | Coleoptera (beetles) 17%                                                                         | Myriapoda (millipedes and centipedes) 17%                                       | % frequency estimated from two larger size classes (>77 mm) from Fig. 1.; no signif. diff. by sex.                                                                           |
| Native     | South America   | Venezuela Evans and Lampo, 1996 [29]                                   | 201         | Combined habitats         | Adult            | Mass        | Coleoptera (beetles) 27%                                                                      | Formicidae (ants) 13%                                                                            | Odonata (larval dragonflies and damselflies) 8%                                 | % mean mass from the text.                                                                                                                                                   |
| Native     | South America   | Venezuela Evans and Lampo, 1996 [29]                                   | 61          | Arid                      | Adult            | Mass        | Coleoptera (beetles) 28%                                                                      | Odonata (larval dragonflies and damselflies) 21%                                                 | Formicidae (ants) 12%                                                           | % mean mass from Table 2; seasonal diff.                                                                                                                                     |
| Native     | South America   | Venezuela Evans and Lampo, 1996 [29]                                   | 42          | Savanna                   | Adult            | Mass        | Coleoptera (beetles) 55%                                                                      | Orthoptera (grasshoppers and crickets) and Formicidae (ants) 3%                                  | Odonata (larval dragonflies and damselflies) 1%                                 | % mean mass from Table 2; seasonal diff.                                                                                                                                     |
| Native     | South America   | Venezuela Evans and Lampo, 1996 [29]                                   | 47          | Forest/scrub              | Adult            | Mass        | Formicidae (ants) 28%                                                                         | Orthoptera (grasshoppers and crickets) and Coleoptera (beetles) 9%                               | Odonata (larval dragonflies and damselflies) 5%                                 | % mean mass from Table 2; seasonal diff.                                                                                                                                     |
| Native     | South America   | Cuzco Amazonico, Peru Parmelee, 1999 [9]                               | 5           | Forest clearing           | Adult            | IRI         | Formicidae (ants) 61%                                                                         | Coleoptera (beetles) 20%                                                                         | Pentatomidae (stink bugs), Hemiptera (true bugs), and Isoptera (termites) 6%    | % frequency calculated and % number and % volume in Appendix 2 were used to calculate IRI.                                                                                   |
| Native     | South America   | Colombia Isaacs and Hoyos, 2010 [100]                                  | 49          | Coffee farms              | n/a              | Frequency   | Coleoptera (beetles, including Curculionidae and Elateridae) 61%                              | Hymenoptera (ants, including <i>Atta</i> , <i>Pheidole</i> , and <i>Odontomachus</i> ) 27%       | Araneae (spiders) 18%                                                           | % frequency calculated from Table 1 using totals for lower resolution taxa; no signif. diff. by sex.                                                                         |
| Native     | South America   | Sucre, Colombia Sampedro-Marin et al., 2011 [87]                       | approx. 87  | Forest/savannah - dry     | Adult            | All         | Hymenoptera (ants) 91%                                                                        | Coleoptera (beetles) 7%                                                                          | Arachnids (spiders) 1%                                                          | Reported importance index is a partial calculation of AIi; reported seasonal values from Table 3 were summed and used to calculate % AIi; no signif. diff. by season or sex. |
| Native     | South America   | Sucre, Colombia Sampedro-Marin et al., 2011 [87]                       | approx. 111 | Forest/savannah - wet     | Adult            | All         | Hymenoptera (ants) 78%                                                                        | Coleoptera (beetles) 21%                                                                         | Diplopoda (millipedes) 1%                                                       | Reported importance index is a partial calculation of AIi; reported seasonal values from Table 3 were summed and used to calculate % AIi; no signif. diff. by season or sex. |
| Native     | South America   | Colombia Blanco-Torres et al., 2020 [101]                              | 44          | Tropical dry forests      | Subadult - adult | Number      | <i>Rhynchotermes</i> (nasute termites) 41%                                                    | <i>Labidus</i> (army ants) 13%                                                                   | <i>Pheidole</i> (big-headed ants) 8%                                            | % number calculated from supplementary digital database; numerous other species were identified in the top percent such as <i>Atta</i> and <i>Solenopsis</i> .               |
| Introduced | Carribean       | Puerto Rico Dexter, 1932 [26]                                          | 301         | Agricultural              | n/a              | All         | <i>Phyllophaga</i> sp. (May beetles) 43%                                                      | Diplopoda (millipedes) 35%                                                                       | <i>Diaprepes spengleri</i> ? (root weevil) 15%                                  | % number and % "bulk" from Table XI used to calculate % AIi.                                                                                                                 |
| Introduced | Carribean       | Puerto Rico Wolcott, 1937 [27]                                         | 89 pellets  | Urban                     | n/a              | Number      | <i>Dyscinetus barbatus</i> (rice beetles) 51%                                                 | <i>Phyllophaga</i> spp. (May beetles) 44%                                                        | <i>Diaprepes abbreviatus</i> (root weevil) 2%                                   | % number calculated for fecal pellets from Rio Piedras in Table 1.                                                                                                           |
| Introduced | North America   | Southeast Florida Krakauer, 1968 [16]                                  | 85          | Urban                     | Adult            | Frequency   | Coleoptera (beetles) 61%                                                                      | Formicidae (ants) 28%                                                                            | Dermaptera (earwigs) and Gastropoda (snails) 21%                                | % frequency from Table 2.                                                                                                                                                    |
| Introduced | North America   | West-central Florida Rossi, 1981 [20]                                  | 34          | Urban                     | Adult            | Frequency   | Coleoptera (beetles) 44%                                                                      | Formicidae (ants) 35%                                                                            | Blattidae (cockroaches) 15%                                                     | % frequency from Table 2; mammal hair had a high frequency (21%) but was probably scavenged.                                                                                 |
| Introduced | North America   | Central Florida Meshaka and Powell, 2010 [33]                          | 95          | Urban                     | Subadult - adult | Importance  | Coleoptera (beetles) 70%                                                                      | Isoptera/Blattodea (termites) 38%                                                                | Hymenoptera (ants) 37%                                                          | % importance inferred from Fig. 3; the Importance Value was referenced as %N+%V+%F but these diet metrics were not provided.                                                 |
| Introduced | North America   | Southwest Florida Current study                                        | 239         | Golf course communities   | Adult            | IRI         | <i>Pheidole</i> sp. (big-headed ants) 35%                                                     | <i>Anadenobolus monilicornis</i> (yellow-banded millipedes) 27%                                  | <i>Sphenophorus venatus</i> (hunting billbug) 19%                               |                                                                                                                                                                              |
| Introduced | North America   | Southwest Florida Current study                                        | 120         | Golf course community A   | Adult            | IRI         | <i>Sphenophorus venatus</i> (hunting billbug) 42%                                             | <i>Pheidole</i> sp. (big-headed ants) 23%                                                        | <i>Anadenobolus monilicornis</i> (yellow-banded millipedes) 15%                 |                                                                                                                                                                              |
| Introduced | North America   | Southwest Florida Current study                                        | 119         | Golf course community B   | Adult            | IRI         | <i>Anadenobolus monilicornis</i> (yellow-banded millipedes) 41%                               | <i>Pheidole</i> sp. (big-headed ants) 36%                                                        | Lepidoptera (moths and butterflies), primarily larvae 8%                        |                                                                                                                                                                              |
| Introduced | North Atlantic  | Bermuda Linzey et al., 1998 [30]                                       | 31          | Urban/marsh - cool season | Adult            | All         | Diplopoda (millipedes) 51%                                                                    | Lepidoptera larvae (moths and butterflies) and Curculionidae (weevils) 11%                       | Formicidae (ants) 8%                                                            | % frequency and % volume for fauna (no vegetation) from Table 2 used to calculate % AIi; seasonal diff.                                                                      |
| Introduced | North Atlantic  | Bermuda Linzey et al., 1998 [30]                                       | 44          | Urban/marsh - hot season  | Adult            | All         | Diplopoda (millipedes) 62%                                                                    | Orthoptera/Blattidae (cockroaches) 23%                                                           | Isoptoda (sowbugs) 4%                                                           | % frequency and % volume for fauna (no vegetation) from Table 2 used to calculate % AIi; seasonal diff.                                                                      |
| Introduced | West Pacific    | Fiji Hinckley, 1963 [102]                                              | 100         | Agricultural/urban        | Juvenile - adult | Number      | Formicidae (ants, including <i>Odontomachus</i> , <i>Tapinoma</i> , and <i>Pheidole</i> ) 34% | Lepidoptera larvae (moths, primarily <i>Pseudaletia separata</i> ) 16%                           | Diplipoda (millipedes, including <i>Asiomorpha</i> and <i>Trigoniulus</i> ) 13% | % number calculated from Table I, using totals for lower resolution taxa.                                                                                                    |
| Introduced | West Pacific    | Papua New Guinea Zug et al., 1975 [28]                                 | 476         | Savanna road              | Subadult - adult | Number      | Isoptera/Blattodea (termites) 39%                                                             | Formicidae (ants, including <i>Polyrhachis</i> , <i>Pheidole</i> , and <i>Odontomachus</i> ) 33% | Lepidoptera (moths and butterflies) 8%                                          | % number calculated from Appendix 2, using totals for lower resolution taxa.                                                                                                 |
| Introduced | West Pacific    | Papua New Guinea Zug et al., 1975 [28]                                 | 37          | Rainforest road           | Subadult - adult | Number      | Formicidae (ants, including <i>Odontomachus</i> and <i>Pheidole</i> ) 61%                     | Curculionidae (weevils) 8%                                                                       | Scarabaeidae (scarab beetles) 6%                                                | % number calculated from Appendix 3, using totals for lower resolution taxa: Lepidoptera and Diplopoda close quarternary (5%) prey.                                          |
| Introduced | West Pacific    | Papua New Guinea Bailey, 1976 [103]                                    | 162         | Cacao plantation          | n/a              | Frequency   | <i>Subulina octina</i> (terrestrial snail) 37%                                                | <i>Odontomachus sirillimus</i> (trap-jaw ant) 25%                                                | Oecophylla smaragdina (Asian weaver ant) 15%                                    | % frequency based on text in the results section.                                                                                                                            |
| Introduced | West Pacific    | Northeastern Queensland, Australia Werren and Trenerry, 1993 [81]      | 257 total   | Upland rainforest         | Adult            | Frequency   | Coleoptera (beetles, excluding weevils) 86%                                                   | Formicidae (ants, excluding bull ants and green tree ants) 79%                                   | Curculionidae (weevils) 53%                                                     | % frequency from Table 1.                                                                                                                                                    |
| Introduced | West Pacific    | Northeastern Queensland, Australia Werren and Trenerry, 1993 [81]      | 257 total   | Lowland rainforest        | Adult            | Frequency   | Formicidae (ants excl. bull ants and green tree ants) 74%                                     | Beetles (excl. weevils) 68%                                                                      | Orthoptera (crickets and katydids) 36%                                          | % frequency from Table 1; Curculionidae (weevils) a close quarternary (31%) prey.                                                                                            |
| Introduced | West Pacific    | American Samoa Grant, 1996 [104]                                       | 26          | Suburban                  | Subadult - adult | All         | Coleoptera (beetles) 37%                                                                      | Lepidoptera (moths) 34%                                                                          | Diplopoda (millipedes) 9%                                                       | % frequency and % number from Table 3 used to calculate AIi; Dermaptera (earwigs) a close quarternary (8%) prey.                                                             |
| Introduced | West Pacific    | American Samoa Grant, 1996 [104]                                       | 28          | Forest                    | Subadult - adult | All         | Diplopoda (millipedes) 58%                                                                    | Lepidoptera (moths) 15%                                                                          | Coleoptera (beetles) 12%                                                        | % frequency and % number from Table 3 used to calculate AIi; Hymenoptera (ants?) a close quarternary (12%) prey.                                                             |
| Introduced | West Pacific    | Rota, Northern Mariana Islands Reed et al., 2007 [10]                  | 284         | Golf course and village   | Juvenile - adult | Frequency   | Coleoptera (beetles) 52%                                                                      | Formicidae (ants) 39%                                                                            | Diplopoda (millipedes) 33%                                                      | % frequency calculated from Table 1 using stomachs with identifiable prey; Orthoptera (grasshoppers) a close quarternary (31%) prey.                                         |
| Introduced | West Pacific    | Japan Kidera et al., 2008 [83]                                         | 18          | Pond                      | Subadult - adult | IRI         | Hymenoptera (mostly ants) 36%                                                                 | Lepidoptera (moths and butterflies) 26%                                                          | Coleoptera (beetles) 22%                                                        | % frequency, % number, and % volume from Table 1 used to calculate % IRI.                                                                                                    |
| Introduced | West Pacific    | Japan Kidera et al., 2008 [83]                                         | 13          | Forest                    | Juvenile - adult | IRI         | Coleoptera (beetles) 35%                                                                      | Hymenoptera (mostly ants) 34%                                                                    | Hemiptera (true bugs) 15%                                                       | % frequency, % number, and % volume from Table 1 used to calculate % IRI.                                                                                                    |
| Introduced | West Pacific    | Japan Kidera et al., 2008 [83]                                         | 27          | Rice paddies              | Subadult - adult | IRI         | Hymenoptera (mostly ants) 55%                                                                 | Diptera larvae (flies) 18%                                                                       | Coleoptera (beetles) 10%                                                        | % frequency, % number, and % volume from Table 1 used to calculate % IRI.                                                                                                    |
| Introduced | West Pacific    | Queensland, Australia Heise-Pavlov and Longway, 2011 [84]              | 81 total    | Agroforestry plantation   | Juvenile         | Number      | Hymenoptera (ants) 71%                                                                        | Coleoptera (beetles) 22%                                                                         | Unidentified Larvae 2%                                                          | % number calculated from the averaged numbers for taxa in Table 1.                                                                                                           |
| Introduced | West Pacific    | Queensland, Australia Heise-Pavlov and Longway, 2011 [84]              | 81 total    | Agroforestry trail        | Juvenile         | Number      | Hymenoptera (ants) 84%                                                                        | Coleoptera (beetles) 9%                                                                          | Hemiptera (true bugs) 2%                                                        | % number calculated from the averaged numbers for taxa in Table 1.                                                                                                           |
| Introduced | West Pacific    | Philippines Pamintuan and Starr, 2016 [31]                             | 58          | Urban - wet season        | n/a              | Number      | Formicidae (ants, including <i>Solenopsis</i> and <i>Oecophylla</i> ) 79%                     | Scarabaeinae (dung beetles) 5%                                                                   | Coleoptera (beetles) 4%                                                         | % number From Table 1; seasonal diff.                                                                                                                                        |
| Introduced | West Pacific    | Philippines Pamintuan and Starr, 2016 [31]                             | 71          | Urban - dry season        | n/a              | Number      | Isoptera/Blattodea (termites) 76%                                                             | Formicidae (ants, including <i>Solenopsis</i> and <i>Oecophylla</i> ) 9%                         | Tenebrionidae (darkling beetles) 8%                                             | % number From Table 1; seasonal diff.                                                                                                                                        |
| Introduced | West Pacific    | Davao City, Philippines Apayor-Ynot et al., 2017 [105]                 | 24          | Park and subdivision      | n/a              | Frequency   | Coleoptera (beetles) 75%                                                                      | Blattodea (cockroaches) 71%                                                                      | Isoptera/Blattodea (termites) 36%                                               | % frequency from Table 1.                                                                                                                                                    |
| Introduced | West Pacific    | Queensland, Australia Lettoof et al., 2018 [106]                       | 57 pellets  | Bird rookery and road     | Juvenile - adult | Number      | Coleoptera (beetles) 43%                                                                      | Hymenoptera (ants) 34%                                                                           | Isoptera/Blattodea (termites) 13%                                               | % number based on text in the results section.                                                                                                                               |
| Introduced | West Pacific    | Philippines Shuman-Goodier et al., 2019 [107]                          | 101         | Rice paddies              | n/a              | All         | <i>Solenopsis geminata</i> (tropical fire ant) 48%                                            | <i>Solenopsis</i> sp. (fire ants) 35%                                                            | Formicidae (unidentified ants) 14%                                              | % frequency and % number from Table 2 used to calculate % AIi.                                                                                                               |
| Introduced | West Pacific    | New South Wales, Australia Kaiser et al., 2022 [32]                    | 195         | Burned/unburned forest    | Adult female     | Number      | Hymenoptera (ants) 50%                                                                        | Coleoptera (beetles) 35%                                                                         | Myriapods (primarily millipedes) 6%                                             | % number calculated by sex from a supplementary spreadsheet; diff. between sexes.                                                                                            |
| Introduced | West Pacific    | New South Wales, Australia Kaiser et al., 2022 [32]                    | 291         | Burned/unburned forest    | Adult male       | Number      | Hymenoptera (ants) 61%                                                                        | Coleoptera (beetles) 28%                                                                         | Lepidoptera (moths and butterflies) 6%                                          | % number calculated by sex from a supplementary spreadsheet; diff. between sexes.                                                                                            |

## References

8. Zug, G.R.; Zug, P.B. The marine toad, *Bufo marinus*: A natural history resume of native populations. *Smithson. Contrib. Zool.* **1979**, *284*, 1–58. <https://doi.org/10.5479/si.00810282.284>.
9. Parmalee, J.R. Trophic ecology of a tropical anuran assemblage. *Scientific Papers. Nat. Hist. Mus. Univ. Kans.* **1999**, *11*, 1–59.
10. Reed, R.N.; Bakkegard, K.A.; Desy, G.E.; Plentovich, S.M. Diet composition of the invasive cane toad (*Chaunus marinus*) on Rota, Northern Mariana Islands. *Pac. Conserv. Biol.* **2007**, *13*, 219–222. <https://doi.org/10.1071/PC070219>.
16. Krakauer, T. The ecology of the neotropical toad, *Bufo marinus*, in south Florida. *Herpetologica* **1968**, *24*, 214–221.
20. Rossi, J.V. *Bufo Marinus* in Florida: Some Natural History and Its Impact on Native Vertebrates. Master's Thesis, University of South Florida, Tampa, FL, USA, December 1981. Available online: [https://usf-flvc.primo.exlibrisgroup.com/discovery/fulldisplay?context=L&vid=01FALSC\\_USF:USF&search\\_scope=MyInst\\_and\\_CI&tab=Everything&docid=alma99379536742206599](https://usf-flvc.primo.exlibrisgroup.com/discovery/fulldisplay?context=L&vid=01FALSC_USF:USF&search_scope=MyInst_and_CI&tab=Everything&docid=alma99379536742206599).
26. Dexter, R.R. The food habits of the imported toad *Bufo marinus* in the sugar cane sections of Porto Rico. *Bull. Fourth Congr. Int. Soc. Sugar Cane Technol.* **1932**, *74*, 1–6.
27. Wolcott, G.N. What the giant Surinam toad, *Bufo marinus* L., is eating now in Puerto Rico. *J. Agric. Univ. Puerto Rico* **1937**, *21*, 79–84. <https://doi.org/10.46429/jaupr.v21i1.14345>.
28. Zug, G.R.; Lindgren, E.; Pippet, J.R. Distribution and ecology of the marine toad, *Bufo marinus*, in Papua New Guinea. *Pac. Sci.* **1975**, *29*, 31–50.
29. Evans, M.; Lampo, M. Diet of *Bufo marinus* in Venezuela. *J. Herpetol.* **1996**, *30*, 73–76. <https://doi.org/10.2307/1564710>.
30. Linzey, D.W.; Deel, A.C.; Adams, S.J.; Linzey, J.B. Spring and summer foods of *Bufo marinus* (Amphibia: Bufonidae) and *Eleutherodactylus johnstonei* (Amphibia: Leptodactylidae) in Bermuda. *J. Elisha Mitchell Sci. Soc.* **1998**, *114*, 125–136.
31. Pamintuan, P.E.; Starr, C.K. Diet of the giant toad, *Bufo marinus* (Amphibia: Salientia), in a coastal habitat of the Philippines. *Trop. Agric.* **2016**, *93*, 323–327.
32. Kaiser, S.W.; Greenlees, M.J.; Shine, R. Sex-based differences in the use of post-fire habitats by invasive cane toads (*Rhinella marina*). *Sci. Rep.* **2022**, *12*, 10610. <https://doi.org/10.1038/s41598-022-14697-7>.
33. Meshaka, W.E., Jr.; Powell, R. Diets of the native southern toad (*Anaxyrus terrestris*) and the exotic cane toad (*Rhinella marina*) form a single site in south-central Florida. *Fla. Sci.* **2010**, *73*, 175–179.
49. Smoak, C.H.; Schmid, J.R. Feeding habits of the non-native Mayan cichlid, *Mayaheros urophthalmus*, in estuarine tributaries of southwest Florida. *Gulf Caribb. Res.* **2021**, *32*, 57–66. <https://doi.org/10.18785/gcr.3201.08>.
51. Pinkas, L.; Oliphant, M.S.; Iverson, I.L.K. Food habits of albacore, Bluefin tuna, and bonito in California waters. *Calif. Dep. Fish Game Fish Bull.* **1971**, *152*, 1–105.
81. Werren, G.L.; Trenerry, M.P. Size and diet of *Bufo marinus* in rainforest of northeastern Queensland. *Mem. Qld. Mus.* **1993**, *34*, 240.
82. Strüssmann, C.; Ribeiro do Vale, M.B.; Meneghini, M.H.; Magnusson, W.E. Diet and foraging mode of *Bufo marinus* and *Leptodactylus ocellatus*. *J. Herpetol.* **1984**, *18*, 138–146. <https://doi.org/10.2307/1563741>.
83. Kidera, N.; Tandavanitj, N.; Oh, D.; Nakanishi, N.; Satoh, A.; Denda, T.; Izawa, M.; Ota, H. Dietary habits of the introduced cane toad *Bufo marinus* (Amphibia: Bufonidae) on Ishigakijima, Southern Ryukyus, Japan. *Pac. Sci.* **2008**, *62*, 423–430. [https://doi.org/10.2984/1534-6188\(2008\)62\[423:DHOTIC\]2.0.CO;2](https://doi.org/10.2984/1534-6188(2008)62[423:DHOTIC]2.0.CO;2).
84. Heise-Pavlov, S.R.; Longway, L.J. Diet and dietary selectivity of cane toads (*Rhinella marina*) in restoration sites: A case study in Far North Queensland, Australia. *Ecol. Manag. Restor.* **2011**, *12*, 230–232. <https://doi.org/10.1111/j.1442-8903.2011.00603.x>.
87. Sampedro-Marín, A.C.; Angulo Villalba, Y.Y.; Arrieta Díaz, F.I.; Domínguez Atencia, D.M. Alimentación de *Bufo marinus* (Linnaeus, 1758) (Bufonidae: Anura), en una localidad de Sucre, Colombia. *Caldasia* **2011**, *33*, 495–505.
96. Noble, G.K. The amphibians collected by the American Museum expedition to Nicaragua in 1916. *Bull. Am. Mus. Nat. Hist.* **1918**, *38*, 311–347.
97. Weber, N.H. The food of the giant toad, *Bufo marinus* (L.), in Trinidad and British Guiana with special reference to the ants. *Ann. Entomol. Soc. Am.* **1938**, *31*, 498–503. <https://doi.org/10.1093/aesa/31.4.499>.
98. Duellman, W.E. The biology of an equatorial herpetofauna in Amazonian Ecuador. *Misc. Publ. Univ. Kans. Mus. Nat. Hist.* **1978**, *65*, 1–352.
99. Cabrera, J.; Barrantes, R.; Rodríguez, D. Hábitos alimentarios de *Bufo marinus* (Anura Bufonidae) en Costa Rica. *Rev. De Biol. Trop.* **1996**, *44*, 702–703.
100. Isaacs, P.; Hoyos, J.M. Diet of the cane toad in different vegetation covers in the productive systems of the Colombian coffee region. *South Am. J. Herpetol.* **2010**, *5*, 45–50. <https://doi.org/10.2994/057.005.0105>.
101. Blanco-Torres, A.; Duré, M.I.; Bonilla, M.A.; Cagnolo, L. Predator-prey interactions in anurans of the tropical dry forests of the Colombian Caribbean: A functional approach. *Biotropica* **2020**, *52*, 730–737. <https://doi.org/10.1111/btp.12779>.
102. Hinckley, A.D. Diet of the giant toad, *Bufo marinus* (L.), in Fiji. *Herpetologica* **1963**, *18*, 253–259.
103. Bailey, P. Food of the marine toad, *Bufo marinus*, and six species of skink in a cacao plantation in New Britain, Papua New Guinea. *Aust. Wildl. Res.* **1976**, *3*, 185–188. <https://doi.org/10.1071/WR9760185>.
104. Grant, G.S. Prey of the introduced *Bufo marinus* on American Samoa. *Herpetol. Rev.* **1996**, *27*, 67–69.
105. Apayor-Ynot, C.L.; Tan, S.N.; Lim, N.K.; Delima-Baron, E.M.; Mohagan, A.B. Diet of cane toads (*Rhinella marina*) collected from areas adjacent to human dwellings in Davao City, Philippines. *Imp. J. Interdiscip. Res.* **2017**, *3*, 640–642.
106. Lettoof, D.C.; Lyons, J.A.; Shine, R.; Maniel, G.; Mayer, M.; Natusch, D.J.D. Cane toads beneath bird rookeries: Utilization of a natural disturbance by an invasive species. *Curr. Zool.* **2018**, *64*, 433–439. <https://doi.org/10.1093/cz/zox041>.
107. Shuman-Goodier, M.E.; Diaz, M.I.; Almazan, M.L.; Singleton, G.R.; Hadi, B.A.R.; Propper, C.R. Ecosystem hero and villain: Native frog consumes rice pests, while the invasive cane toad feasts on beneficial arthropods. *Agric. Ecosyst. Environ.* **2019**, *279*, 100–108. <https://doi.org/10.1016/j.agee.2019.04.008>.
