# Supplementary material for: Faunal Diet of Adult Cane Toads, Rhinella marina, in the Urban Landscape of Southwest Florida
Source: MDPI journal article supplement (doi:10.3390/ani13182898), 2023-09-13
Supplement: s1 [file s1]

Table S2. Cumulative list of the number (N), volume (V), frequency (F), and index of relative importance (IRI) of prey taxa for cane toads collected in southwest Florida golf course communities. Taxa with the highest IRI are in bold.

| Prey taxonomy (Common name)                                           | N           | % N          | V             | % V          | F         | % F          | %IRI         |
|-----------------------------------------------------------------------|-------------|--------------|---------------|--------------|-----------|--------------|--------------|
| Annelida (Segmented worms)                                            | -           | -            | -             | -            | -         | -            | -            |
| Clitellata (Collar worms)                                             | -           | -            | -             | -            | -         | -            | -            |
| Opisthopora (Terrestrial worms)                                       | 18          | 0.13         | 10.50         | 0.96         | 11        | 4.60         | 0.12         |
| Lumbricidae (Earthworms)                                              | 38          | 0.27         | 2.50          | 0.23         | 3         | 1.26         | 0.02         |
| Platyhelminthes (Flatworms)                                           | -           | -            | -             | -            | -         | -            | -            |
| Trematoda (Parasitic worms)                                           | 6           | 0.04         | 0.02          | <0.01        | 2         | 0.84         | <0.01        |
| Arthropoda (Invertebrate animals such as crabs, spiders, and insects) | 3           | 0.02         | <0.01         | <0.01        | 1         | 0.42         | <0.01        |
| Chilopoda (Centipedes)                                                | 11          | 0.08         | 0.01          | <0.01        | 5         | 2.09         | <0.01        |
| Geophilomorpha (Soil centipedes)                                      | 2           | 0.01         | 0.11          | 0.01         | 2         | 0.84         | <0.01        |
| Collembola (Springtails)                                              | -           | -            | -             | -            | -         | -            | -            |
| Poduromorpha                                                          | 2           | 0.01         | 0.10          | 0.01         | 1         | 0.42         | <0.01        |
| Diplopoda (Millipedes)                                                | 18          | 0.13         | 2.40          | 0.22         | 5         | 2.09         | 0.02         |
| Julida (Julid millipedes)                                             | -           | -            | -             | -            | -         | -            | -            |
| Parajulidae (Cylindrical millipedes)                                  | 43          | 0.31         | 9.71          | 0.89         | 17        | 7.11         | 0.20         |
| Polydesmida (Flat-backed millipedes)                                  | 13          | 0.09         | 0.90          | 0.08         | 1         | 0.42         | <0.01        |
| Paradoxosomatidae (Dragon millipedes)                                 | 49          | 0.35         | 4.01          | 0.37         | 13        | 5.44         | 0.09         |
| <i>Asiomorpha coarctata</i> (Long-flange millipedes)                  | 186         | 1.33         | 20.50         | 1.87         | 34        | 14.23        | 1.10         |
| <i>Oxidus gracilis</i> (Greenhouse millipedes)                        | 14          | 0.10         | 1.55          | 0.14         | 2         | 0.84         | <0.01        |
| Polyzoniida (Polyzoniid millipedes)                                   | -           | -            | -             | -            | -         | -            | -            |
| Siphonotidae                                                          | -           | -            | -             | -            | -         | -            | -            |
| <i>Rhinotus purpureus</i> (Purple womble millipede)                   | 6           | 0.04         | 0.01          | <0.01        | 1         | 0.42         | <0.01        |
| Spirobolida (Round-backed millipedes)                                 | 6           | 0.04         | 4.50          | 0.41         | 3         | 1.26         | 0.01         |
| Rhinoecicidae                                                         | -           | -            | -             | -            | -         | -            | -            |
| <b><i>Anadenobolus monilicornis</i> (Yellow-banded millipedes)</b>    | <b>631</b>  | <b>4.52</b>  | <b>298.47</b> | <b>27.29</b> | <b>89</b> | <b>37.24</b> | <b>28.48</b> |
| Euchelicerata (Spiders, mites, scorpions, and related taxa)           | 1           | 0.01         | <0.01         | <0.01        | 1         | 0.42         | <0.01        |
| Araneae (Spiders)                                                     | 20          | 0.14         | 1.62          | 0.15         | 14        | 5.86         | 0.04         |
| Araneidae (Orbweaver spiders)                                         | -           | -            | -             | -            | -         | -            | -            |
| <i>Gasteracantha cancriformis</i> (Spinybacked orbweavers)            | 1           | 0.01         | 0.04          | <0.01        | 1         | 0.42         | <0.01        |
| Clubionidae (Sac spiders)                                             | -           | -            | -             | -            | -         | -            | -            |
| <i>Clubiona</i> (Leafcurling sac spiders)                             | 5           | 0.04         | 0.80          | 0.07         | 3         | 1.26         | <0.01        |
| Lycosidae (Wolf spiders)                                              | 9           | 0.06         | 1.79          | 0.16         | 8         | 3.35         | 0.02         |
| <i>Allocosa</i> (Wolf spiders)                                        | 1           | 0.01         | 0.01          | <0.01        | 1         | 0.42         | <0.01        |
| <i>Tigrosa</i> ("Fierce like a tiger" wolf spiders)                   | 1           | 0.01         | 0.50          | 0.05         | 1         | 0.42         | <0.01        |
| <i>Tigrosa annexa</i> (Wolf spiders)                                  | 12          | 0.09         | 5.75          | 0.53         | 11        | 4.60         | 0.07         |
| <i>Trebacosa marxi</i> (Dull wolf spiders)                            | 1           | 0.01         | 0.20          | 0.02         | 1         | 0.42         | <0.01        |
| Pisauridae (Nursery web spiders)                                      | 1           | 0.01         | 0.40          | 0.04         | 1         | 0.42         | <0.01        |
| <i>Dolomedes triton</i> (Six-spotted fishing spiders)                 | 13          | 0.09         | 7.80          | 0.71         | 9         | 3.77         | 0.07         |
| Tetragnatha (Long-jawed orb weavers)                                  | 2           | 0.01         | 0.41          | 0.04         | 2         | 0.84         | <0.01        |
| Mesostigmata (Predatory mites)                                        | 3           | 0.02         | <0.01         | <0.01        | 2         | 0.84         | <0.01        |
| Sarcoptiformes (Mites)                                                | 15          | 0.11         | 0.41          | 0.04         | 3         | 1.26         | <0.01        |
| Galumnidae (Mites and ticks)                                          | 1           | 0.01         | <0.01         | <0.01        | 1         | 0.42         | <0.01        |
| Trombidiformes (Mites)                                                | 1           | 0.01         | <0.01         | <0.01        | 1         | 0.42         | <0.01        |
| Insecta (Beetles, ants, earwigs, butterflies, and related taxa)       | 121         | 0.87         | 5.21          | 0.48         | 29        | 12.13        | 0.39         |
| Blattodea (Cockroaches and termites)                                  | 5           | 0.04         | 0.41          | 0.04         | 2         | 0.84         | <0.01        |
| Blaberidae (Giant cockroaches)                                        | 1           | 0.01         | <0.01         | <0.01        | 1         | 0.42         | <0.01        |
| <i>Pycnoscelus</i>                                                    | 1           | 0.01         | 0.80          | 0.07         | 1         | 0.42         | <0.01        |
| <i>Pycnoscelus surinamensis</i> (Surinam cockroaches)                 | 12          | 0.09         | 7.95          | 0.73         | 5         | 2.09         | 0.04         |
| Coleoptera (Beetles)                                                  | 375         | 2.69         | 20.43         | 1.87         | 65        | 27.20        | 2.98         |
| Carabidae (Ground beetles)                                            | 9           | 0.06         | 1.50          | 0.14         | 4         | 1.67         | 0.01         |
| <i>Agonum</i>                                                         | 2           | 0.01         | 0.20          | 0.02         | 2         | 0.84         | <0.01        |
| <i>Harpalus</i>                                                       | 1           | 0.01         | 0.40          | 0.04         | 1         | 0.42         | <0.01        |
| <i>Loxandrus</i>                                                      | 1           | 0.01         | 0.20          | 0.02         | 1         | 0.42         | <0.01        |
| <i>Omophron labiatum</i> (Large-lipped round sand beetles)            | 1           | 0.01         | 0.01          | <0.01        | 1         | 0.42         | <0.01        |
| <i>Pasimachus</i>                                                     | 3           | 0.02         | 1.32          | 0.12         | 3         | 1.26         | <0.01        |
| <i>Scarites</i>                                                       | 3           | 0.02         | 1.60          | 0.15         | 3         | 1.26         | 0.01         |
| <i>Selenophorus</i>                                                   | 1           | 0.01         | 0.10          | 0.01         | 1         | 0.42         | <0.01        |
| <i>Semiardistomis</i>                                                 | 6           | 0.04         | 0.50          | 0.05         | 3         | 1.26         | <0.01        |
| Chrysomelidae (Leaf beetles)                                          | -           | -            | -             | -            | -         | -            | -            |
| <i>Caryobruchus glediisae</i> (Palm seed weevils)                     | 1           | 0.01         | 0.40          | 0.04         | 1         | 0.42         | <0.01        |
| <i>Donacia</i> (Aquatic leaf beetles)                                 | 2           | 0.01         | 0.40          | 0.04         | 2         | 0.84         | <0.01        |
| Coccinellidae (Lady bugs)                                             | 3           | 0.02         | <0.01         | <0.01        | 2         | 0.84         | <0.01        |
| <i>Harmonia axyridis</i> (Multicolored Asian ladybugs)                | 1           | 0.01         | 0.05          | <0.01        | 1         | 0.42         | <0.01        |
| Curculionidae (True weevils)                                          | 112         | 0.80         | 10.65         | 0.97         | 11        | 4.60         | 0.20         |
| <i>Coccotrypes distinctus</i> (Bark beetles)                          | 1           | 0.01         | <0.01         | <0.01        | 1         | 0.42         | <0.01        |
| <i>Mylocerus undecimpustulatus undatus</i> (Sri Lankan weevils)       | 1           | 0.01         | 0.10          | 0.01         | 1         | 0.42         | <0.01        |
| <i>Sphenophorus</i> (Billbugs)                                        | 232         | 1.66         | 24.52         | 2.24         | 16        | 6.69         | 0.63         |
| <i>Sphenophorus inaequalis</i> (Uneven billbugs)                      | 259         | 1.86         | 26.37         | 2.41         | 29        | 12.13        | 1.24         |
| <b><i>Sphenophorus venatus</i> (Hunting billbugs)</b>                 | <b>1556</b> | <b>11.15</b> | <b>128.16</b> | <b>11.72</b> | <b>86</b> | <b>35.98</b> | <b>19.78</b> |
| <i>Xyleborus</i> (Ambrosia beetles)                                   | 1           | 0.01         | <0.01         | <0.01        | 1         | 0.42         | <0.01        |
| Dryopidae (Long-toed water beetles)                                   | -           | -            | -             | -            | -         | -            | -            |
| <i>Pelonomus</i>                                                      | 1           | 0.01         | 0.03          | <0.01        | 1         | 0.42         | <0.01        |
| Dytiscidae (Predaceous diving beetles)                                | 1           | 0.01         | 0.10          | 0.01         | 1         | 0.42         | <0.01        |
| Elateridae (Click beetles)                                            | 54          | 0.39         | 3.72          | 0.34         | 18        | 7.53         | 0.13         |
| <i>Conoderus</i> ("Cone-necked")                                      | 2           | 0.01         | 0.05          | <0.01        | 1         | 0.42         | <0.01        |
| <i>Conoderus fallii</i> (Southern potato wireworms)                   | 69          | 0.49         | 4.34          | 0.40         | 38        | 15.90        | 0.34         |
| <i>Conoderus pictus</i> (Click beetles)                               | 1           | 0.01         | 0.01          | <0.01        | 1         | 0.42         | <0.01        |
| <i>Heteroderes amplicollis</i> (Gulf wireworms)                       | 8           | 0.06         | 0.11          | 0.01         | 4         | 1.67         | <0.01        |
| <i>Rismethus</i>                                                      | 11          | 0.08         | 0.22          | 0.02         | 8         | 3.35         | 0.01         |
| Heteroceridae (Variegated mud-loving beetles)                         | -           | -            | -             | -            | -         | -            | -            |
| <i>Tropicus pusillus</i> (Variegated mud-loving beetles)              | 1           | 0.01         | 0.50          | 0.05         | 1         | 0.42         | <0.01        |
| Hybosoridae (Scavenger scarab beetles)                                | -           | -            | -             | -            | -         | -            | -            |
| <i>Hybosorus illigeri</i> (Scavenger scarab beetles)                  | 97          | 0.69         | 15.52         | 1.42         | 22        | 9.21         | 0.47         |
| Hydrophilidae (Water scavenger beetles)                               | 1           | 0.01         | 0.10          | 0.01         | 1         | 0.42         | <0.01        |
| <i>Tropisternus</i>                                                   | 3           | 0.02         | 0.20          | 0.02         | 1         | 0.42         | <0.01        |
| <i>Tropisternus natator</i> (Water scavenger beetles)                 | 3           | 0.02         | 0.71          | 0.06         | 3         | 1.26         | <0.01        |
| Nitidulidae (Sap beetles)                                             | -           | -            | -             | -            | -         | -            | -            |
| <i>Stelidota</i> (Sap-feeding beetles)                                | 1           | 0.01         | <0.01         | <0.01        | 1         | 0.42         | <0.01        |
| Ptilodactylidae (Toe-winged beetles)                                  | 2           | 0.01         | 0.10          | 0.01         | 2         | 0.84         | <0.01        |
| <i>Ptilodactyla</i> (Toe-winged beetles)                              | 26          | 0.19         | 0.70          | 0.06         | 11        | 4.60         | 0.03         |
| Scarabaeidae (Scarab beetles)                                         | 131         | 0.94         | 25.24         | 2.31         | 25        | 10.46        | 0.82         |
| <i>Anomala</i>                                                        | 8           | 0.06         | 1.61          | 0.15         | 4         | 1.67         | 0.01         |
| <i>Anomala innuba</i> (Shining leaf chafers)                          | 3           | 0.02         | 0.76          | 0.07         | 2         | 0.84         | <0.01        |
| <i>Anomala marginata</i> (Shining leaf chafers)                       | 10          | 0.07         | 5.60          | 0.51         | 7         | 2.93         | 0.04         |
| <i>Ataenius</i> (Dung beetles)                                        | 15          | 0.11         | 0.21          | 0.02         | 4         | 1.67         | 0.01         |
| <i>Ataenius imbricatus</i> (Aphodiine dung beetles)                   | 2           | 0.01         | 0.05          | <0.01        | 1         | 0.42         | <0.01        |
| <i>Cyclocephala</i> (Masked chafers)                                  | 23          | 0.16         | 7.24          | 0.66         | 10        | 4.18         | 0.08         |
| <i>Dyscinetus</i> (Rice beetles)                                      | 1           | 0.01         | 1.00          | 0.09         | 1         | 0.42         | <0.01        |
| <i>Dyscinetus morator</i> (Rice beetles)                              | 7           | 0.05         | 5.60          | 0.51         | 6         | 2.51         | 0.03         |
| <i>Euphoria sepulcralis</i> (Dark flower scarabs)                     | 48          | 0.34         | 5.57          | 0.51         | 14        | 5.86         | 0.12         |
| <i>Geopsammodius</i> (Aphodiine dung beetles)                         | 7           | 0.05         | 0.30          | 0.03         | 2         | 0.84         | <0.01        |
| <i>Onthophagus hecate blatchleyi</i> (Scoopfed scarabs)               | 1           | 0.01         | 0.10          | 0.01         | 1         | 0.42         | <0.01        |
| <i>Phyllophaga bruneri</i> (Cuban May beetles)                        | 77          | 0.55         | 31.03         | 2.84         | 26        | 10.88        | 0.89         |
| <i>Tomarus</i> (Carrot beetles)                                       | 13          | 0.09         | 12.50         | 1.14         | 9         | 3.77         | 0.11         |
| Staphylinidae (Rove beetles)                                          | 2           | 0.01         | 0.18          | 0.02         | 2         | 0.84         | <0.01        |
| Tenebrionidae (Darkling beetles)                                      | -           | -            | -             | -            | -         | -            | -            |
| <i>Gondwanacrypticus</i>                                              | 1           | 0.01         | <0.01         | <0.01        | 1         | 0.42         | <0.01        |
| <i>Platyderma</i>                                                     | 51          | 0.37         | 5.34          | 0.49         | 8         | 3.35         | 0.07         |
| Dermaptera (Earwigs)                                                  | 21          | 0.15         | 0.64          | 0.06         | 8         | 3.35         | 0.02         |
| Carcinophoridae (Earwigs)                                             | 2           | 0.01         | 0.02          | <0.01        | 1         | 0.42         | <0.01        |
| <i>Euborellia</i>                                                     | 1           | 0.01         | 0.05          | <0.01        | 1         | 0.42         | <0.01        |
| <i>Euborellia annulipes</i> (Ring-legged earwigs)                     | 20          | 0.14         | 1.20          | 0.11         | 13        | 5.44         | 0.03         |
| Labiduridae (Striped earwigs)                                         | 8           | 0.06         | 1.12          | 0.10         | 6         | 2.51         | 0.01         |
| <i>Labidura</i>                                                       | 1           | 0.01         | <0.01         | <0.01        | 1         | 0.42         | <0.01        |
| <i>Labidura riparia</i> (Shore earwigs)                               | 319         | 2.28         | 48.13         | 4.40         | 62        | 25.94        | 4.17         |
| Diptera (Flies)                                                       | 75          | 0.54         | 5.93          | 0.54         | 6         | 2.51         | 0.07         |
| Calliphoridae (Carrion flies)                                         | 5           | 0.04         | 0.70          | 0.06         | 3         | 1.26         | <0.01        |
| Cecidomyiidae (Gall midges)                                           | 1           | 0.01         | <0.01         | <0.01        | 1         | 0.42         | <0.01        |
| Chloropidae (Chloropid flies)                                         | 3           | 0.02         | <0.01         | <0.01        | 2         | 0.84         | <0.01        |
| Sciariidae (Dark-winged fungus gnats)                                 | 1           | 0.01         | <0.01         | <0.01        | 1         | 0.42         | <0.01        |
| Stratiomyidae (Soldier fly maggots)                                   | 1           | 0.01         | 0.05          | <0.01        | 1         | 0.42         | <0.01        |
| Hemiptera (True bugs, hoppers, aphids, and allies)                    | 5           | 0.04         | 0.40          | 0.04         | 3         | 1.26         | <0.01        |
| Belostomatidae (Giant water bugs)                                     | -           | -            | -             | -            | -         | -            | -            |
| <i>Belostoma</i> (Giant water bugs)                                   | 1           | 0.01         | 0.30          | 0.03         | 1         | 0.42         | <0.01        |
| <i>Lethocerus (Benacus) griseus</i> (Eastern toe biters)              | 1           | 0.01         | 7.50          | 0.69         | 1         | 0.42         | 0.01         |
| Blissidae                                                             | -           | -            | -             | -            | -         | -            | -            |
| <i>Blissus</i> (Chinch bugs)                                          | 1           | 0.01         | <0.01         | <0.01        | 1         | 0.42         | <0.01        |
| Cicadidae (Cicadas)                                                   | 1           | 0.01         | 3.50          | 0.32         | 1         | 0.42         | <0.01        |
| Coreidae (Leaf-footed bugs)                                           | 1           | 0.01         | 0.30          | 0.03         | 1         | 0.42         | <0.01        |
| Cydnidae (Burrowing bugs)                                             | 1           | 0.01         | 0.01          | <0.01        | 1         | 0.42         | <0.01        |
| Ochteridae (Velvety shore bugs)                                       | -           | -            | -             | -            | -         | -            | -            |
| <i>Ochterus</i> (Velvety shore bugs)                                  | 1           | 0.01         | <0.01         | <0.01        | 1         | 0.42         | <0.01        |
| Tropiduchidae (Planthoppers)                                          | -           | -            | -             | -            | -         | -            | -            |
| <i>Pelitropis rotulata</i> (tropiduchid planthopper)                  | 1           | 0.01         | 0.10          | 0.01         | 1         | 0.42         | <0.01        |
| Hymenoptera (Ants, bees, wasps, and sawflies)                         | 23          | 0.16         | 2.41          | 0.22         | 12        | 5.02         | 0.05         |
| Apidae (Honey bees, bumble bees, and allies)                          | 3           | 0.02         | 0.50          | 0.05         | 3         | 1.26         | <0.01        |
| <i>Apis</i> (Honey bees)                                              | 1           | 0.01         | 0.50          | 0.05         | 1         | 0.42         | <0.01        |
| <i>Apis mellifera</i> (Western honey bees)                            | 145         | 1.04         | 25.60         | 2.34         | 7         | 2.93         | 0.24         |
| Crabronidae (Crabronid wasps)                                         | -           | -            | -             | -            | -         | -            | -            |
| <i>Larra bicolor</i> (Mole cricket hunters)                           | 1           | 0.01         | 0.50          | 0.05         | 1         | 0.42         | <0.01        |
| Formicidae (Ants)                                                     | 249         | 1.78         | 2.65          | 0.24         | 27        | 11.30        | 0.55         |
| <i>Brachymyrmex</i> (Rover ants)                                      | 1317        | 9.43         | 3.26          | 0.30         | 10        | 4.18         | 0.98         |
| <i>Brachymyrmex obscurior</i> (Obscure rover ants)                    | 545         | 3.90         | 1.94          | 0.18         | 6         | 2.51         | 0.25         |
| <i>Camponotus</i> (Carpenter ants)                                    | 2           | 0.01         | <0.01         | <0.01        | 2         | 0.84         | <0.01        |
| <i>Camponotus floridanus</i> (Florida carpenter ants)                 | 472         | 3.38         | 10.84         | 0.99         | 32        | 13.39        | 1.41         |
| <i>Camponotus sexguttatus</i> (Six-spotted carpenter ants)            | 1           | 0.01         | 0.01          | <0.01        | 1         | 0.42         | <0.01        |
| <i>Camponotus tortuganus</i> (Tortugas carpenter ants)                | 1           | 0.01         | <0.01         | <0.01        | 1         | 0.42         | <0.01        |
| <i>Crematogaster</i> (Acrobat ants)                                   | 2           | 0.01         | 0.05          | <0.01        | 2         | 0.84         | <0.01        |
| <i>Hypoponera opaciceps</i> (Granulate mini-ponerine ants)            | 1           | 0.01         | <0.01         | <0.01        | 1         | 0.42         | <0.01        |
| <i>Hypoponera pacior</i> (Mini-ponerine ants)                         | 1           | 0.01         | <0.01         | <0.01        | 1         | 0.42         | <0.01        |
| <i>Nylanderia bourbonica</i> (Robust Crazy ants)                      | 2           | 0.01         | 0.15          | 0.01         | 2         | 0.84         | <0.01        |
| <i>Odontomachus</i> (Giant trap-jaw ants)                             | 55          | 0.39         | 2.63          | 0.24         | 28        | 11.72        | 0.18         |
| <i>Odontomachus brunneus</i> (Florida trap-jaw ants)                  | 27          | 0.19         | 1.60          | 0.15         | 3         | 1.26         | 0.01</       |
